# Supplementary material for: Safety Analysis of Signal-Coordinated Arterials with Multiple Heterogeneities
Source: Hindawi journal article supplement (doi:10.1155/2021/2730113), 2021-09-09
Supplement: f1 [file 2730113.f1.docx]

## Supplementary Materials

Table S1: Regressive results of variables related to models 1-2.

| Location | Type | Variable | Model 1 | |  | Model 2 | |
| --- | --- | --- | --- | --- | --- | --- | --- |
| Mean (SD) | 95% BCI |  | Mean (SD) | 95% BCI |
| Roadway Segment | Injury Crash | Intercept | 0.992 (0.032) | (0.929, 1.053) |  | 0.996 (0.032) | (0.934, 1.058) |
| Median Width | 0.162 (0.141) | (-0.109, 0.434) |  | 0.842 (0.191) | (0.542, 1.280) |
| Functional Roadway Classification | 0.828 (0.215) | (0.404, 1.257) |  | 0.985 (0.197) | (0.598, 1.372) |
| Lane Density | 0.382 (0.144) | (0.101, 0.659) |  | 0.822 (0.165) | (0.533, 1.178) |
| Posted Speed Limit | -0.423 (0.139) | (-0.691, -0.160) |  | 0.426 (0.236) | (-0.069, 0.838) |
| Log AADT | 0.042 (0.168) | (-0.300, 0.367) |  | 0.662 (0.183) | (0.299, 1.047) |
| PDO Crash | Intercept | 0.993 (0.032) | (0.931, 1.055) |  | 0.999 (0.031) | (0.938, 1.060) |
| Median Width | 0.224 (0.147) | (-0.066, 0.531) |  | 0.810 (0.160) | (0.557, 1.177) |
| Functional Roadway Classification | 0.815 (0.217) | (0.394, 1.240) |  | 0.947 (0.192) | (0.579, 1.323) |
| Lane Density | 0.400 (0.159) | (0.083, 0.690) |  | 0.849 (0.138) | (0.614, 1.136) |
| Posted Speed Limit | -0.231 (0.124) | (-0.486, 0.169) |  | 0.681 (0.228) | (0.204, 1.103) |
| Log AADT | 0.162 (0.142) | (-0.109, 0.439) |  | 0.602 (0.147) | (0.300, 0.882) |
|  |  |  |  |  |  |  |  |
| Signalized Intersection | Injury Crash | Intercept | 0.752  (0.213) | (0.328, 1.163) |  | 0.558 (0.197) | (0.178, 0.942) |
| NETMA | -0.141  (0.127) | (-0.414, 0.104) |  | -0.037 (0.130) | (-0.279, 0.23) |
| NETMI | 0.229  (0.118) | (0.004, 0.471) |  | 0.410 (0.161) | (0.130, 0.751) |
| PLMA | 0.587  (0.189) | (0.214, 0.958) |  | 0.743 (0.168) | (0.418, 1.081) |
| PLMI | 0.796  (0.184) | (0.439, 1.156) |  | 0.864 (0.170) | (0.532, 1.197) |
| Number of Legs | 0.689  (0.182) | (0.334, 1.045) |  | 0.685 (0.176) | (0.344, 1.038) |
| PMMA | 0.483  (0.194) | (0.110, 0.868) |  | 0.675 (0.187) | (0.309, 1.040) |
| PMMI | 0.553  (0.198) | (0.169, 0.943) |  | 0.687 (0.191) | (0.324, 1.076) |
| ASD | 0.006  (0.033) | (-0.058, 0.067) |  | -0.028 (0.048) | (-0.144, 0.055) |
| Log AADT on Major Road | 0.181  (0.138) | (-0.087, 0.449) |  | 0.219 (0.128) | (-0.018, 0.479) |
| PDO Crash | Intercept | 0.945 (0.219) | (0.520, 1.378) |  | 0.987 (0.201) | (0.602, 1.374) |
| NETMA | 0.074 (0.127) | (-0.155, 0.313) |  | 0.193 (0.129) | (-0.047, 0.453) |
| NETMI | 0.241 (0.104) | (0.048, 0.456) |  | 0.401 (0.167) | (0.103, 0.740) |
| PLMA | 0.643 (0.190) | (0.278, 1.034) |  | 0.778 (0.170) | (0.450, 1.124) |
| PLMI | 0.793 (0.169) | (0.462, 1.124) |  | 0.791 (0.173) | (0.461, 1.129) |
| Number of Legs | 0.772 (0.186) | (0.399, 1.131) |  | 0.872 (0.177) | (0.511, 1.226) |
| PMMA | 0.480 (0.190) | (0.112, 0.852) |  | 0.708 (0.191) | (0.345, 1.088) |
| PMMI | 0.598 (0.187) | (0.216, 0.945) |  | 0.837 (0.186) | (0.478, 1.207) |
| ASD | 0.026 (0.032) | (-0.038, 0.096) |  | -0.022 (0.049) | (-0.13, 0.061) |
| Log AADT on Major Road | 0.331 (0.133) | (0.078, 0.592) |  | 0.309 (0.119) | (0.102, 0.561) |

Note: the detailed variable description is shown in Table 1.

Table S2: Regressive results of variables related to models 3-4.

| Location | Type | Variable | Model 3 | |  | Model 4 | |
| --- | --- | --- | --- | --- | --- | --- | --- |
| Mean (SD) | 95% BCI |  | Mean (SD) | 95% BCI |
| Roadway Segment | Injury Crash | Intercept | 0.999 (0.031) | (0.938, 1.060) |  | 0.998 (0.032) | (0.934, 1.060) |
| Median Width | 0.417 (0.153) | (0.136, 0.717) |  | 0.476 (0.128) | (0.216, 0.715) |
| Functional Roadway Classification | 0.949 (0.188) | (0.574, 1.319) |  | 0.936 (0.190) | (0.568, 1.318) |
| Lane Density | 0.617 (0.129) | (0.360, 0.864) |  | 0.632 (0.111) | (0.419, 0.849) |
| Posted Speed Limit | 0.706 (0.213) | (0.313, 1.140) |  | 0.713 (0.225) | (0.216, 1.115) |
| Log AADT | 0.726 (0.162) | (0.409, 1.034) |  | 0.761 (0.141) | (0.501, 1.060) |
| PDO Crash | Intercept | 0.998 (0.032) | (0.935, 1.060) |  | 0.998 (0.033) | (0.934, 1.062) |
| Median Width | 0.427 (0.155) | (0.134, 0.736) |  | 0.485 (0.127) | (0.218, 0.713) |
| Functional Roadway Classification | 0.953 (0.187) | (0.583, 1.320) |  | 0.925 (0.188) | (0.564, 1.299) |
| Lane Density | 0.732 (0.129) | (0.470, 0.981) |  | 0.737 (0.108) | (0.524, 0.948) |
| Posted Speed Limit | 0.696 (0.197) | (0.310, 1.063) |  | 0.723 (0.158) | (0.429, 1.048) |
| Log AADT | 0.666 (0.158) | (0.377, 0.974) |  | 0.718 (0.135) | (0.462, 0.976) |
|  |  |  |  |  |  |  |  |
| TAZ | Crash | Length | -0.106 (0.156) | (-0.427, 0.158) |  | -0.079 (0.098) | (-0.267, 0.117) |
| Average Posted Speed Limit | -0.466 (0.107) | (-0.666, -0.260) |  | -0.515 (0.066) | (-0.636, -0.380) |
| Average AADT | 0.834 (0.138) | (0.569, 1.110) |  | 0.879 (0.133) | (0.634, 1.165) |
|  |  |  |  |  |  |  |  |
| Signalized Intersection | Injury Crash | Intercept | 0.887 (0.227) | (0.442, 1.319) |  | 0.897 (0.245) | (0.421, 1.390) |
| NETMA | 0.521 (0.178) | (0.194, 0.882) |  | 0.476 (0.192) | (0.158, 0.911) |
| NETMI | 0.662 (0.172) | (0.342, 1.005) |  | 0.647 (0.151) | (0.344, 0.944) |
| PLMA | 1.024 (0.182) | (0.671, 1.379) |  | 0.982 (0.178) | (0.634, 1.338) |
| PLMI | 1.012 (0.182) | (0.645, 1.366) |  | 0.999 (0.177) | (0.657, 1.353) |
| Number of Legs | 0.901 (0.179) | (0.545, 1.242) |  | 0.879 (0.184) | (0.520, 1.242) |
| PMMA | 0.870 (0.192) | (0.487, 1.240) |  | 0.857 (0.186) | (0.488, 1.219) |
| PMMI | 0.866 (0.190) | (0.492, 1.236) |  | 0.847 (0.186) | (0.483, 1.210) |
| ASD | 0.140 (0.071) | (0.008, 0.288) |  | 0.079 (0.057) | (-0.024, 0.201) |
| Log AADT on Major Road | 0.703 (0.187) | (0.341, 1.045) |  | 0.655 (0.147) | (0.385, 0.959) |
| PDO Crash | Intercept | 0.981 (0.235) | (0.500, 1.433) |  | 0.920 (0.237) | (0.461, 1.381) |
| NETMA | 0.589 (0.199) | (0.188, 1.057) |  | 0.558 (0.197) | (0.222, 0.987) |
| NETMI | 0.614 (0.168) | (0.301, 0.970) |  | 0.631 (0.152) | (0.324, 0.930) |
| PLMA | 0.875 (0.181) | (0.525, 1.239) |  | 0.896 (0.190) | (0.524, 1.261) |
| PLMI | 0.857 (0.163) | (0.561, 1.182) |  | 0.868 (0.175) | (0.538, 1.208) |
| Number of Legs | 0.993 (0.175) | (0.647, 1.338) |  | 0.957 (0.187) | (0.580, 1.303) |
| PMMA | 0.831 (0.195) | (0.429, 1.200) |  | 0.881 (0.189) | (0.487, 1.224) |
| PMMI | 0.923 (0.179) | (0.569, 1.271) |  | 0.931 (0.179) | (0.577, 1.293) |
| ASD | 0.134 (0.066) | (0.009, 0.260) |  | 0.083 (0.057) | (-0.013, 0.206) |
|  | Log AADT on Major Road | 0.668 (0.182) | (0.319, 0.996) |  | 0.655 (0.155) | (0.389, 0.948) |

Note: the detailed variable description is shown in Table 1.


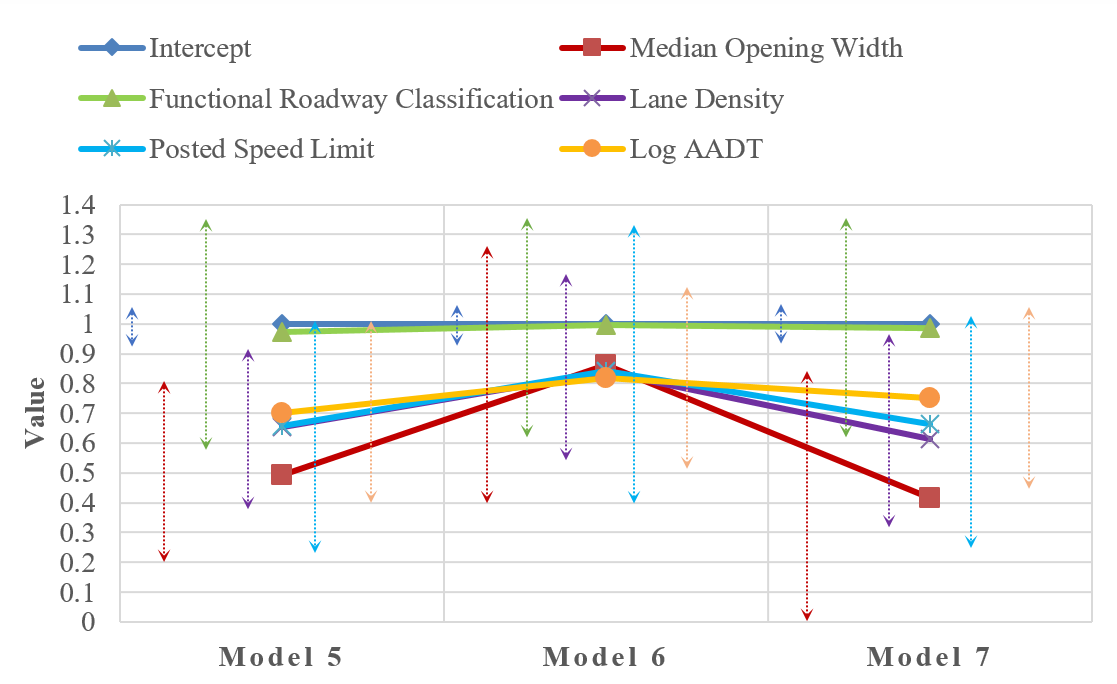


Figure S1: The point range plot of contributors to injury crashes for roadway segments. The arrow range represents the corresponding 95% BCI.


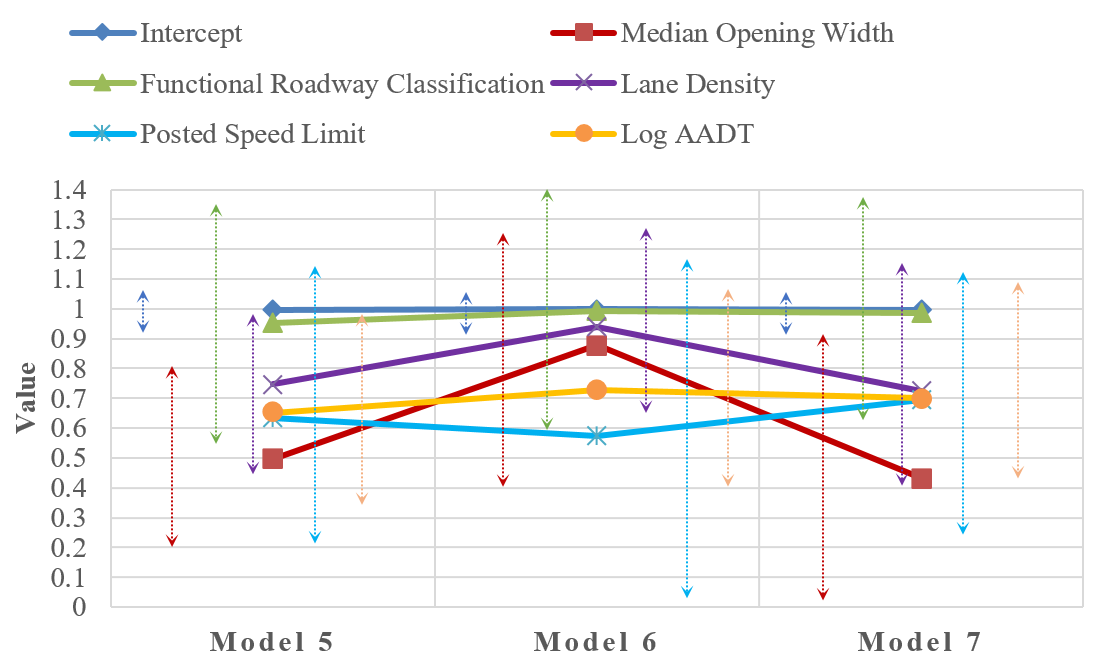


Figure S2: The point range plot of contributors to PDO crashes for roadway segments. The arrow range represents the corresponding 95% BCI.


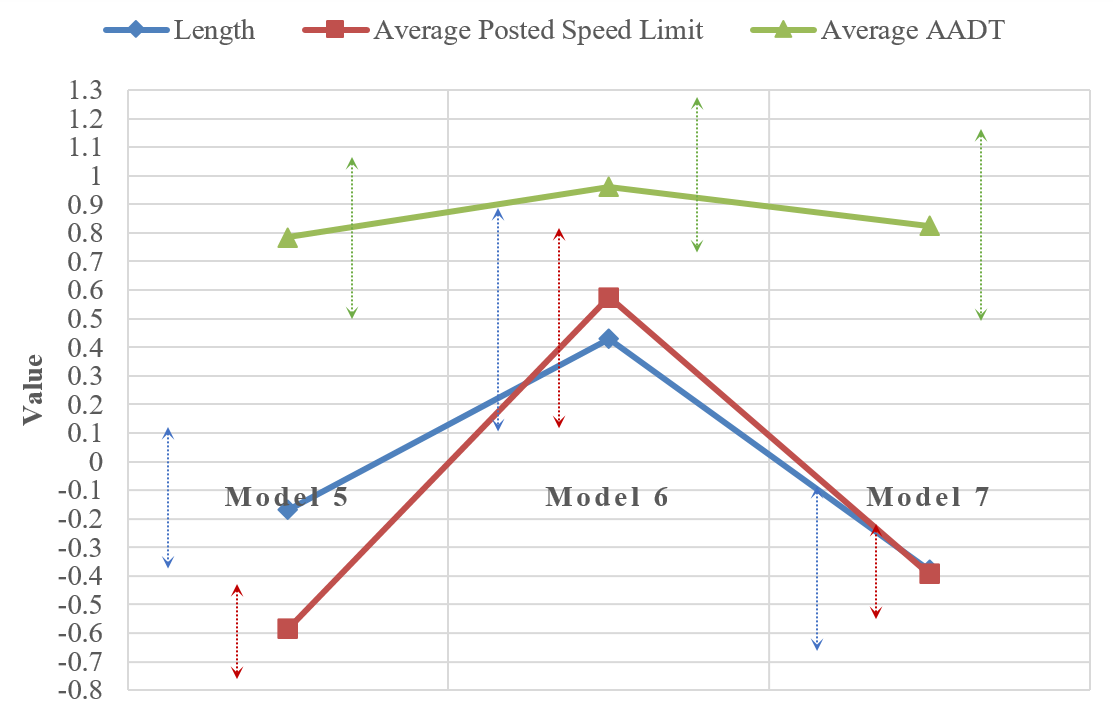


Figure S3: The point range plot of contributors to crashes for TAZs. The arrow range represents the corresponding 95% BCI.


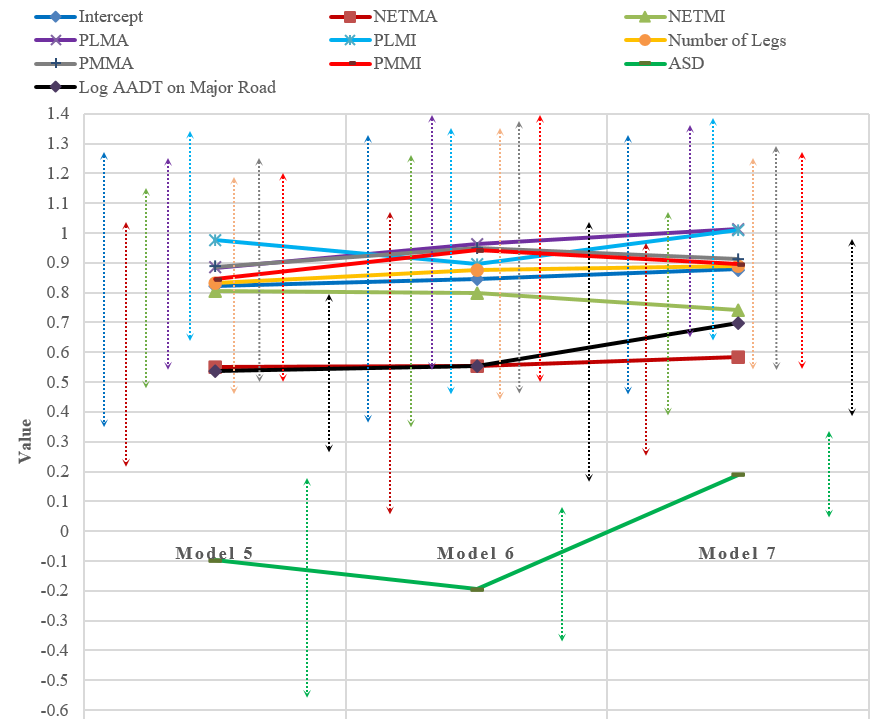


Figure S4: The point range plot of contributors to injury crashes for signalized intersections. The arrow range represents the corresponding 95% BCI.


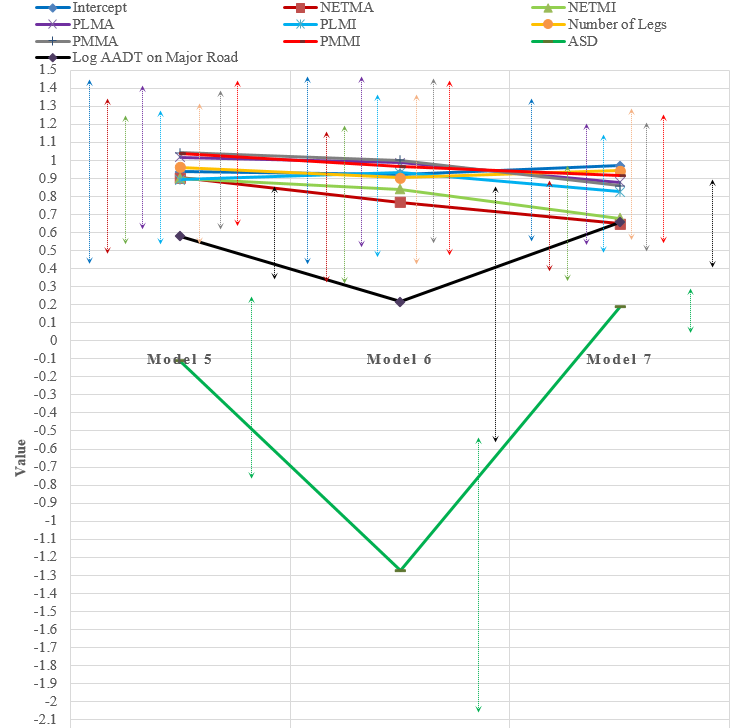


Figure S5: The point range plot of contributors to PDO crashes for signalized intersections. The arrow range represents the corresponding 95% BCI.
